# Supplementary material
Source: PubMed Central journal article supplement (PMC4958170)
Supplement: AAC.00220-16_zac008165391so1.pdf [file AAC.00220-16_zac008165391so1.pdf]

1 **Supplemental Table S1.** MIC and cumulative percent inhibited distributions for ceftazidime and ceftazidime-avibactam against 1,627

2 clinical isolates of ceftazidime non-susceptible *P. aeruginosa* collected in 2012-2014 in four geographic regions<sup>a</sup>.

| Region                            | Phenotype/<br>genotype (no.)        | Antimicrobial agent   | No. of isolates / (cumulative % of isolates) inhibited at MIC (µg/ml) of: |             |               |               |               |                     |                     |                      |                      |                     |                    |
|-----------------------------------|-------------------------------------|-----------------------|---------------------------------------------------------------------------|-------------|---------------|---------------|---------------|---------------------|---------------------|----------------------|----------------------|---------------------|--------------------|
|                                   |                                     |                       | ≤0.5                                                                      | 1           | 2             | 4             | 8             | 16                  | 32                  | 64                   | 128                  | >128                |                    |
| All regions                       | All isolates (1,627)                | Ceftazidime           | 0<br>(0.0)                                                                | 0<br>(0.0)  | 0<br>(0.0)    | 0<br>(0.0)    | 0<br>(0.0)    | 320<br>(19.7)       | 479<br>(49.1)       | 452<br>(76.9)        | 190<br>(88.6)        | <b>186</b><br>(100) |                    |
|                                   |                                     | Ceftazidime-avibactam | 3<br>(0.2)                                                                | 37<br>(2.5) | 218<br>(15.9) | 318<br>(35.4) | 488<br>(65.4) | 176<br>(76.2)       | 163<br>(86.2)       | <b>115</b><br>(93.3) | 47<br>(96.2)         | 62<br>(100)         |                    |
|                                   | MBL-negative (1,329) <sup>b,c</sup> | Ceftazidime           | 0<br>(0.0)                                                                | 0<br>(0.0)  | 0<br>(0.0)    | 0<br>(0.0)    | 0<br>(0.0)    | 285<br>(21.4)       | 390<br>(50.8)       | 364<br>(78.2)        | <b>163</b><br>(90.4) | 127<br>(100)        |                    |
|                                   |                                     | Ceftazidime-avibactam | 3<br>(0.2)                                                                | 37<br>(3.0) | 217<br>(19.3) | 318<br>(43.3) | 482<br>(79.5) | 130<br>(89.3)       | <b>68</b><br>(94.4) | 43<br>(97.7)         | 15<br>(98.8)         | 16<br>(100)         |                    |
|                                   | Europe                              | All isolates (880)    | Ceftazidime                                                               | 0<br>(0.0)  | 0<br>(0.0)    | 0<br>(0.0)    | 0<br>(0.0)    | 0<br>(0.0)          | 178<br>(20.2)       | 272<br>(51.1)        | 255<br>(80.1)        | <b>94</b><br>(90.8) | 81<br>(100)        |
|                                   |                                     |                       | Ceftazidime-avibactam                                                     | 1<br>(0.1)  | 23<br>(2.7)   | 140<br>(18.6) | 168<br>(37.7) | 260<br>(67.3)       | 99<br>(78.5)        | 92<br>(89.0)         | <b>58</b><br>(95.6)  | 18<br>(97.6)        | 21<br>(100)        |
| MBL-negative (730) <sup>b,c</sup> |                                     | Ceftazidime           | 0<br>(0.0)                                                                | 0<br>(0.0)  | 0<br>(0.0)    | 0<br>(0.0)    | 0<br>(0.0)    | 159<br>(21.8)       | 227<br>(52.9)       | 202<br>(80.5)        | <b>84</b><br>(92.1)  | 58<br>(100)         |                    |
|                                   |                                     | Ceftazidime-avibactam | 1<br>(0.1)                                                                | 23<br>(3.3) | 139<br>(22.3) | 168<br>(45.3) | 258<br>(80.7) | <b>74</b><br>(90.8) | 35<br>(95.6)        | 20<br>(98.4)         | 7<br>(99.3)          | 5<br>(100)          |                    |
| Asia/ South<br>Pacific            |                                     | All isolates (305)    | Ceftazidime                                                               | 0<br>(0.0)  | 0<br>(0.0)    | 0<br>(0.0)    | 0<br>(0.0)    | 0<br>(0.0)          | 51<br>(16.7)        | 79<br>(42.6)         | 84<br>(70.2)         | 38<br>(82.6)        | <b>53</b><br>(100) |
|                                   |                                     |                       | Ceftazidime-avibactam                                                     | 1<br>(0.3)  | 7<br>(2.6)    | 34<br>(13.8)  | 65<br>(35.1)  | 103<br>(68.9)       | 17<br>(74.4)        | 12<br>(78.4)         | 21<br>(85.2)         | <b>17</b><br>(90.8) | 28<br>(100)        |
|                                   | MBL-negative (254) <sup>b,c</sup>   | Ceftazidime           | 0<br>(0.0)                                                                | 0<br>(0.0)  | 0<br>(0.0)    | 0<br>(0.0)    | 0<br>(0.0)    | 51<br>(20.1)        | 72<br>(48.4)        | 73<br>(77.2)         | 32<br>(89.8)         | <b>26</b><br>(100)  |                    |
|                                   |                                     | Ceftazidime-avibactam | 1<br>(0.4)                                                                | 7<br>(3.1)  | 34<br>(16.5)  | 65<br>(42.1)  | 103<br>(82.7) | 16<br>(89.0)        | <b>8</b><br>(92.1)  | 6<br>(94.5)          | 6<br>(96.9)          | 8<br>(100)          |                    |
|                                   | Latin America                       | All isolates (310)    | Ceftazidime                                                               | 0<br>(0.0)  | 0<br>(0.0)    | 0<br>(0.0)    | 0<br>(0.0)    | 0<br>(0.0)          | 70<br>(22.6)        | 85<br>(50.0)         | 70<br>(72.6)         | 38<br>(84.8)        | <b>47</b><br>(100) |
|                                   |                                     |                       | Ceftazidime-avibactam                                                     | 1<br>(0.3)  | 4<br>(1.6)    | 31<br>(11.6)  | 53<br>(28.7)  | 98<br>(60.3)        | 47<br>(75.5)        | 43<br>(89.4)         | <b>17</b><br>(94.8)  | 6<br>(96.8)         | 10<br>(100)        |
| MBL-negative (254) <sup>b,c</sup> |                                     | Ceftazidime           | 0<br>(0.0)                                                                | 0<br>(0.0)  | 0<br>(0.0)    | 0<br>(0.0)    | 0<br>(0.0)    | 60<br>(23.6)        | 60<br>(47.2)        | 60<br>(70.9)         | 33<br>(83.9)         | <b>41</b><br>(100)  |                    |
|                                   |                                     | Ceftazidime-avibactam | 1<br>(0.4)                                                                | 4<br>(2.0)  | 31<br>(14.2)  | 53<br>(35.0)  | 95<br>(72.4)  | 33<br>(85.4)        | <b>20</b><br>(93.3) | 12<br>(98.0)         | 2<br>(98.8)          | 3<br>(100)          |                    |

| Region                           | Phenotype/<br>genotype (no.) | Antimicrobial agent | No. of isolates / (cumulative % of isolates) inhibited at MIC ( $\mu\text{g/ml}$ ) of: |        |        |        |        |               |               |               |               |       |
|----------------------------------|------------------------------|---------------------|----------------------------------------------------------------------------------------|--------|--------|--------|--------|---------------|---------------|---------------|---------------|-------|
|                                  |                              |                     | $\leq 0.5$                                                                             | 1      | 2      | 4      | 8      | 16            | 32            | 64            | 128           | >128  |
| Middle East/<br>Africa           | All isolates (132)           | Ceftazidime         | 0                                                                                      | 0      | 0      | 0      | 0      | 21            | 43            | 43            | <b>20</b>     | 5     |
|                                  |                              |                     | (0.0)                                                                                  | (0.0)  | (0.0)  | (0.0)  | (0.0)  | (15.9)        | (48.5)        | (81.1)        | <b>(96.2)</b> | (100) |
|                                  | Ceftazidime-avibactam        | 0                   | 3                                                                                      | 13     | 32     | 27     | 13     | 16            | <b>19</b>     | 6             | 3             |       |
|                                  |                              | (0.0)               | (2.3)                                                                                  | (12.1) | (36.4) | (56.8) | (66.7) | (78.8)        | <b>(93.2)</b> | (97.7)        | (100)         |       |
| MBL-negative (91) <sup>b,c</sup> | Ceftazidime                  | 0                   | 0                                                                                      | 0      | 0      | 0      | 15     | 31            | 29            | <b>14</b>     | 2             |       |
|                                  |                              | (0.0)               | (0.0)                                                                                  | (0.0)  | (0.0)  | (0.0)  | (16.5) | (50.5)        | (82.4)        | <b>(97.8)</b> | (100)         |       |
|                                  | Ceftazidime-avibactam        | 0                   | 3                                                                                      | 13     | 32     | 26     | 7      | <b>5</b>      | 5             | 0             | 0             |       |
|                                  |                              | (0.0)               | (3.3)                                                                                  | (17.6) | (52.7) | (81.3) | (89.0) | <b>(94.5)</b> | (100)         | (-)           | (-)           |       |

3 <sup>a</sup> The MIC inhibiting 90% of isolates (MIC<sub>90</sub>) is bolded.

4 <sup>b</sup> MBL: metallo-  $\beta$ -lactamase

5 <sup>c</sup> Carbapenem-sensitive and carbapenem non-susceptible metallo- $\beta$ -lactamase-negative.

6

7 **Supplemental Table S2.** MIC and cumulative percent inhibited distributions for ceftazidime and ceftazidime-avibactam against 1,926

8 clinical isolates of meropenem non-susceptible *P. aeruginosa* collected in 2012-2014 in four geographic regions<sup>a</sup>.

| Region                          | Phenotype/<br>genotype (no.)      | Antimicrobial agent   | No. of isolates / (cumulative % of isolates) inhibited at MIC (µg/ml) of: |             |               |               |               |                             |               |                             |                             |                            |                           |
|---------------------------------|-----------------------------------|-----------------------|---------------------------------------------------------------------------|-------------|---------------|---------------|---------------|-----------------------------|---------------|-----------------------------|-----------------------------|----------------------------|---------------------------|
|                                 |                                   |                       | ≤0.5                                                                      | 1           | 2             | 4             | 8             | 16                          | 32            | 64                          | 128                         | >128                       |                           |
| All regions                     | All isolates (1,926)              | Ceftazidime           | 3<br>(0.2)                                                                | 24<br>(1.4) | 231<br>(13.4) | 275<br>(27.7) | 284<br>(42.4) | 173<br>(51.4)               | 304<br>(67.2) | 317<br>(83.6)               | <b>137</b><br><b>(90.8)</b> | 178<br>(100)               |                           |
|                                 |                                   | Ceftazidime-avibactam | 7<br>(0.4)                                                                | 99<br>(5.5) | 376<br>(25.0) | 420<br>(46.8) | 493<br>(72.4) | 160<br>(80.7)               | 155<br>(88.8) | <b>107</b><br><b>(94.3)</b> | 47<br>(96.8)                | 62<br>(100)                |                           |
|                                 | MBL-negative (1,626) <sup>b</sup> | Ceftazidime           | 3<br>(0.2)                                                                | 24<br>(1.7) | 229<br>(15.7) | 275<br>(32.7) | 278<br>(49.8) | 140<br>(58.4)               | 219<br>(71.8) | 229<br>(85.9)               | <b>110</b><br><b>(92.7)</b> | 119<br>(100)               |                           |
|                                 |                                   | Ceftazidime-avibactam | 7<br>(0.4)                                                                | 99<br>(6.5) | 374<br>(29.5) | 420<br>(55.4) | 481<br>(84.9) | <b>116</b><br><b>(92.1)</b> | 62<br>(95.9)  | 36<br>(98.1)                | 15<br>(99.0)                | 16<br>(100)                |                           |
|                                 | Europe                            | All isolates (1,056)  | Ceftazidime                                                               | 2<br>(0.2)  | 15<br>(1.6)   | 123<br>(13.3) | 142<br>(26.7) | 154<br>(41.3)               | 103<br>(51.0) | 182<br>(68.3)               | 187<br>(86.0)               | <b>72</b><br><b>(92.8)</b> | 76<br>(100)               |
|                                 |                                   |                       | Ceftazidime-avibactam                                                     | 5<br>(0.5)  | 64<br>(6.5)   | 205<br>(25.9) | 241<br>(48.8) | 269<br>(74.2)               | 89<br>(82.7)  | <b>88</b><br><b>(91.0)</b>  | 56<br>(96.3)                | 18<br>(98.0)               | 21<br>(100)               |
| MBL-negative (904) <sup>b</sup> |                                   | Ceftazidime           | 2<br>(0.2)                                                                | 15<br>(1.9) | 122<br>(15.4) | 142<br>(31.1) | 152<br>(47.9) | 85<br>(57.3)                | 137<br>(72.5) | 134<br>(87.3)               | <b>62</b><br><b>(94.1)</b>  | 53<br>(100)                |                           |
|                                 |                                   | Ceftazidime-avibactam | 5<br>(0.6)                                                                | 64<br>(7.6) | 204<br>(30.2) | 241<br>(56.9) | 265<br>(86.2) | <b>64</b><br><b>(93.3)</b>  | 31<br>(96.7)  | 18<br>(98.7)                | 7<br>(99.4)                 | 5<br>(100)                 |                           |
| Asia/ South<br>Pacific          |                                   | All isolates (314)    | Ceftazidime                                                               | 1<br>(0.3)  | 5<br>(1.9)    | 44<br>(15.9)  | 42<br>(29.3)  | 51<br>(45.5)                | 18<br>(51.3)  | 38<br>(63.4)                | 46<br>(78.0)                | 18<br>(83.8)               | <b>51</b><br><b>(100)</b> |
|                                 |                                   |                       | Ceftazidime-avibactam                                                     | 1<br>(0.3)  | 14<br>(4.8)   | 67<br>(26.1)  | 64<br>(46.5)  | 79<br>(71.7)                | 14<br>(76.1)  | 12<br>(79.9)                | 18<br>(85.7)                | <b>17</b><br><b>(91.1)</b> | 28<br>(100)               |
|                                 | MBL-negative (263) <sup>b</sup>   | Ceftazidime           | 1<br>(0.4)                                                                | 5<br>(2.3)  | 44<br>(19.0)  | 42<br>(35.0)  | 50<br>(54.0)  | 18<br>(60.8)                | 32<br>(73.0)  | 35<br>(86.3)                | <b>12</b><br><b>(90.9)</b>  | 24<br>(100)                |                           |
|                                 |                                   | Ceftazidime-avibactam | 1<br>(0.4)                                                                | 14<br>(5.7) | 67<br>(31.2)  | 64<br>(55.5)  | 78<br>(85.2)  | <b>13</b><br><b>(90.1)</b>  | 8<br>(93.2)   | 4<br>(94.7)                 | 6<br>(97.0)                 | 8<br>(100)                 |                           |
|                                 | Latin America                     | All isolates (382)    | Ceftazidime                                                               | 0<br>(0.0)  | 2<br>(0.5)    | 39<br>(10.7)  | 60<br>(26.4)  | 53<br>(40.3)                | 38<br>(50.3)  | 57<br>(65.2)                | 54<br>(79.3)                | 33<br>(88.0)               | <b>46</b><br><b>(100)</b> |
|                                 |                                   |                       | Ceftazidime-avibactam                                                     | 1<br>(0.3)  | 11<br>(3.1)   | 67<br>(20.7)  | 84<br>(42.7)  | 105<br>(70.2)               | 44<br>(81.7)  | <b>39</b><br><b>(91.9)</b>  | 15<br>(95.8)                | 6<br>(97.4)                | 10<br>(100)               |
| MBL-negative (329) <sup>b</sup> |                                   | Ceftazidime           | 0<br>(0.0)                                                                | 2<br>(0.6)  | 39<br>(12.5)  | 60<br>(30.7)  | 52<br>(46.5)  | 29<br>(55.3)                | 35<br>(66.0)  | 44<br>(79.3)                | 28<br>(87.8)                | <b>40</b><br><b>(100)</b>  |                           |
|                                 |                                   | Ceftazidime-avibactam | 1<br>(0.3)                                                                | 11<br>(3.6) | 67<br>(24.0)  | 84<br>(49.5)  | 101<br>(80.2) | <b>32</b><br><b>(90.0)</b>  | 18<br>(95.4)  | 10<br>(98.5)                | 2<br>(99.1)                 | 3<br>(100)                 |                           |

| Region                 | Phenotype/<br>genotype (no.)    | Antimicrobial agent   | No. of isolates / (cumulative % of isolates) inhibited at MIC ( $\mu\text{g/ml}$ ) of: |             |              |              |              |                           |              |                            |                            |            |
|------------------------|---------------------------------|-----------------------|----------------------------------------------------------------------------------------|-------------|--------------|--------------|--------------|---------------------------|--------------|----------------------------|----------------------------|------------|
|                        |                                 |                       | $\leq 0.5$                                                                             | 1           | 2            | 4            | 8            | 16                        | 32           | 64                         | 128                        | >128       |
| Middle East/<br>Africa | All isolates (174)              | Ceftazidime           | 0<br>(0.0)                                                                             | 2<br>(1.1)  | 25<br>(15.5) | 31<br>(33.3) | 26<br>(48.3) | 14<br>(56.3)              | 27<br>(71.8) | 30<br>(89.1)               | <b>14</b><br><b>(97.1)</b> | 5<br>(100) |
|                        |                                 | Ceftazidime-avibactam | 0<br>(0.0)                                                                             | 10<br>(5.7) | 37<br>(27.0) | 31<br>(44.8) | 40<br>(67.8) | 13<br>(75.3)              | 16<br>(84.5) | <b>18</b><br><b>(94.8)</b> | 6<br>(98.3)                | 3<br>(100) |
|                        | MBL-negative (130) <sup>b</sup> | Ceftazidime           | 0<br>(0.0)                                                                             | 2<br>(1.5)  | 24<br>(20.0) | 31<br>(43.8) | 24<br>(62.3) | 8<br>(68.5)               | 15<br>(80.0) | <b>16</b><br><b>(92.3)</b> | 8<br>(98.5)                | 2<br>(100) |
|                        |                                 | Ceftazidime-avibactam | 0<br>(0.0)                                                                             | 10<br>(7.7) | 36<br>(35.4) | 31<br>(59.2) | 37<br>(87.7) | <b>7</b><br><b>(93.1)</b> | 5<br>(96.9)  | 4<br>(100)                 | 0<br>(-)                   | 0<br>(-)   |

9 <sup>a</sup> The MIC inhibiting 90% of isolates (MIC<sub>90</sub>) is bolded.

10 <sup>b</sup> MBL: metallo-  $\beta$ -lactamase
